# Supplementary material for: Pomegranate juice alters the microbiota in breast milk and infant stool: a pilot study
Source: Royal Society of Chemistry journal article supplement (doi:10.1039/d2fo00280a), 2022-01-01

Supplementary Material

Table S1. P-values of beta diversity statistical analysis of change from baseline to day 15 after PomJ consumption in breast milk, mother stool and infant stool.

| Sample       | Analysis type | p-value |
|--------------|---------------|---------|
| Breast milk  | Unweighted    | 0.182   |
| Breast milk  | Weighted      | 0.648   |
| Breast milk  | Bray-Curtis   | 0.739   |
| Mother stool | Unweighted    | 0.933   |
| Mother stool | Weighted      | 0.902   |
| Mother stool | Bray-Curtis   | 0.859   |
| Infant stool | Unweighted    | 0.952   |
| Infant stool | Weighted      | 0.952   |
| Infant stool | Bray-Curtis   | 0.313   |

Figure S1. Mother and infant urine expressed in  $\mu\text{mol/g}$  creatinine.

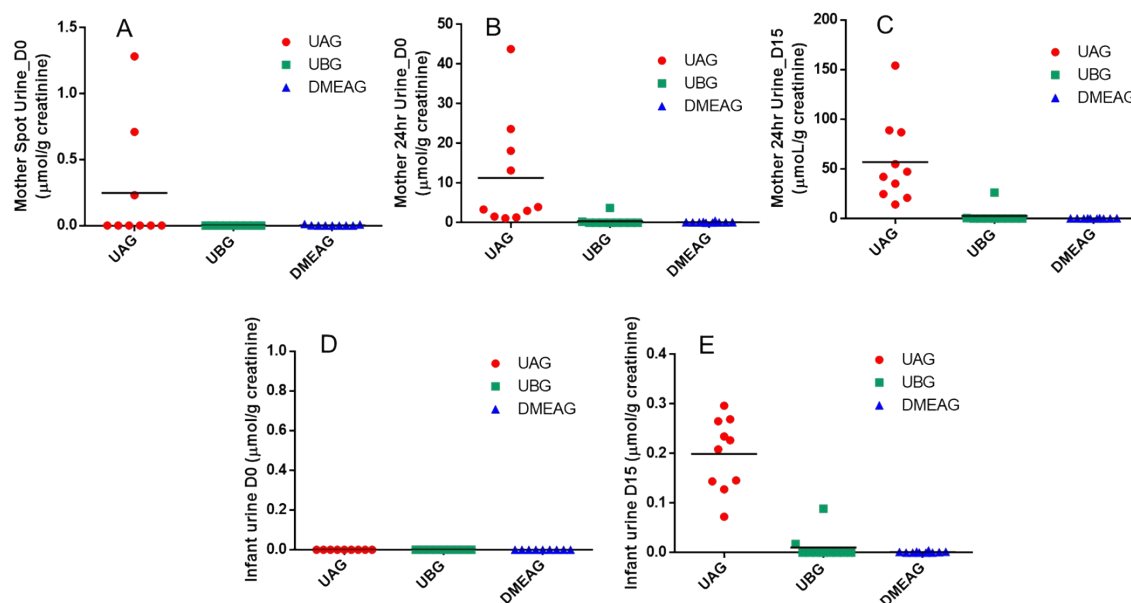

Figure S2. Beta diversity unweighted (A) and weighted Unifrac (B)

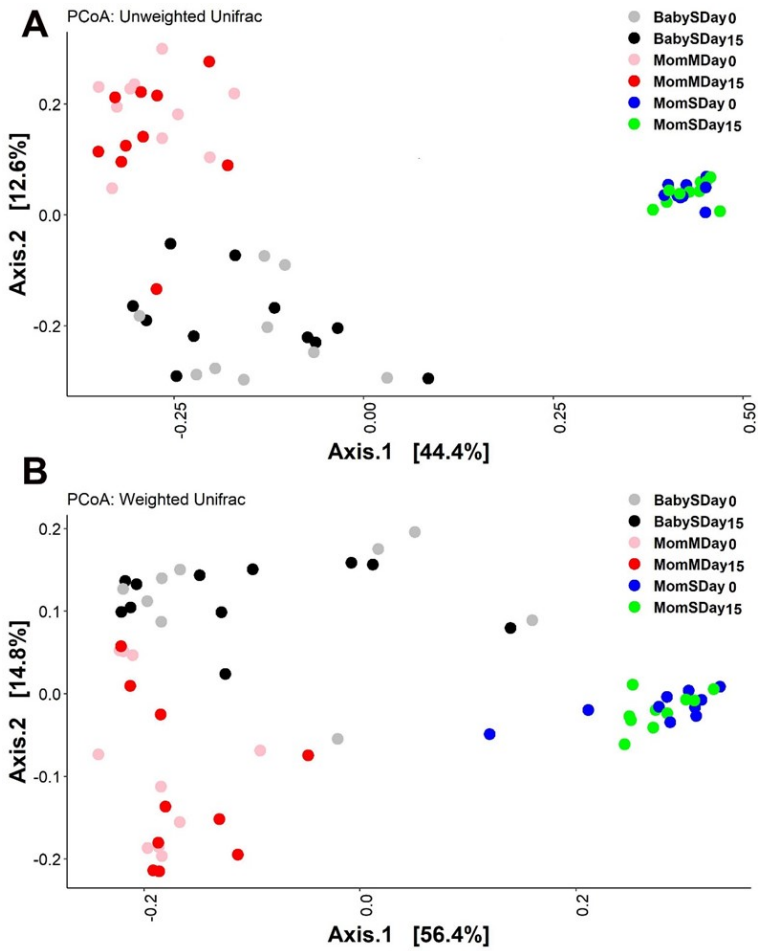

Figure S3. Microbial genera identified to be significantly different in abundance between day 0 and day 15 after PomJ consumption. Microbiota in breast milk analyzed by metabotype. A) Metabotype A [N=8], B) Metabotype B [N=2].

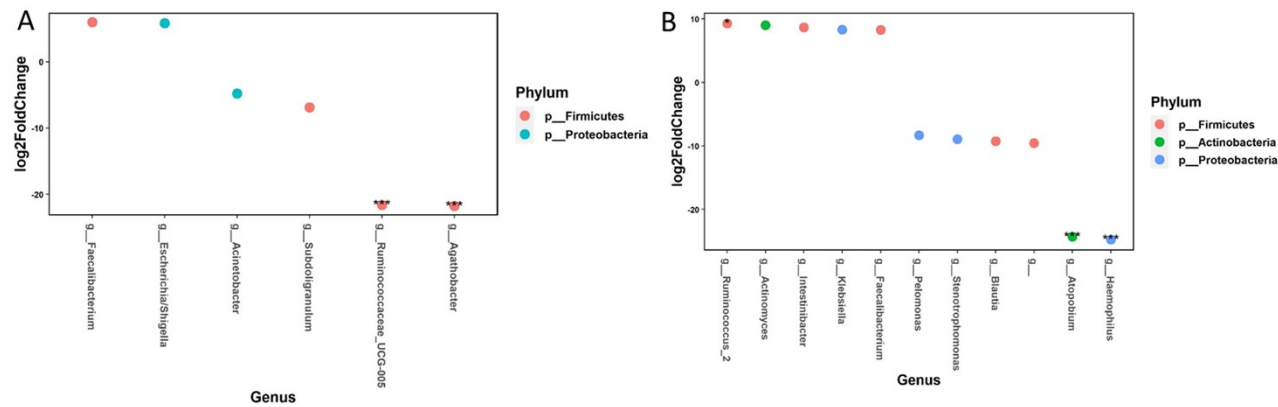

Figure S4: Microbial genera identified to be significantly different in abundance between day 0 and day 15 after PomJ consumption. Microbiota in infant stool analyzed by metabotype. A) Metabotype A [N=8], B) Metabotype B [N=2].

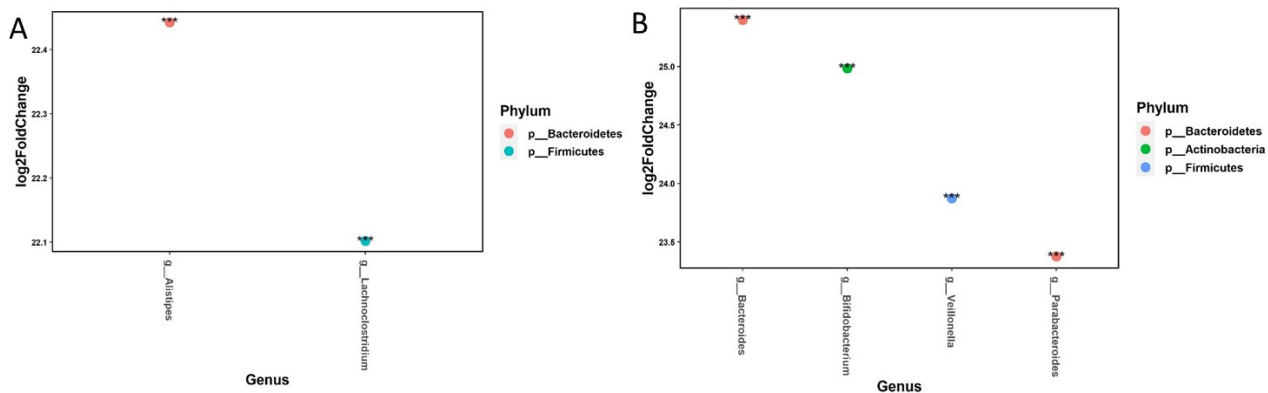

Supplement: d2fo00280a1.pdf [file d2fo00280a1.pdf]
